# Supplementary material for: Drilling Predation on Serpulid Polychaetes (Ditrupa arietina) from the Pliocene of the Cope Basin, Murcia Region, Southeastern Spain
Source: PLoS One. 2012 Apr 5;7(4):e34576. doi: 10.1371/journal.pone.0034576 (PMC3320621; doi:10.1371/journal.pone.0034576)
Supplement: Table S2 — A summary of bivariate morphometric measurements for 28 complete specimens of Ditrupa arietina from the Pliocene of Spain. The column labels (first row, from left to right) are as follows: Specimen – specimen number; Length – specimen length [mm]; and Width – specimen maximum width [mm]. The file was last updated on March 8, 2012. (XLSX) [file pone.0034576.s002.xlsx]

## Sheet: Sheet1
Specimen	Length [mm]	Width [mm]
1	3.952	0.683
2	4.597	0.702
3	3.945	0.701
4	4.659	0.781
5	4.293	0.74
6	3.79	0.587
7	4.204	0.718
8	3.352	0.672
9	4.482	0.75
10	4.882	0.796
11	3.091	0.561
12	4.438	0.783
13	3.122	0.55
14	5.387	0.864
15	4.178	0.658
16	12.418	1.242
17	10.491	1.206
18	13.367	1.195
19	12.409	1.398
20	11.057	1.328
21	11.627	1.288
22	9.8	1.103
23	8.085	0.974
24	9.052	1.066
25	8.641	0.871
26	6.569	0.786
27	5.975	0.715
28	8.915	1.102
